# Supplementary material for: Chemical identification and indexing in full-text articles: an overview of the NLM-Chem track at BioCreative VII
Source: Oxford University Press journal article supplement (doi:10.1093/database/baad005), 2023-01-01
Supplement: baad005_supp.zip [file baad005_supp.zip]

*Supplemental Table 1.* Official chemical identification results for strict and approximate named entity recognition measures. Runs are ordered by strict F-score, descending. Highest value in each column is marked in bold. Runs marked with an asterisk are unofficial.

| Team / Run | Strict        |               |               | Approximate   |               |               |
|------------|---------------|---------------|---------------|---------------|---------------|---------------|
|            | Precision     | Recall        | F-score       | Precision     | Recall        | F-score       |
| 139 / 3    | 0.8759        | 0.8587        | <b>0.8672</b> | 0.9373        | 0.9161        | <b>0.9266</b> |
| 139 / 1    | 0.8747        | 0.8523        | 0.8633        | 0.9361        | 0.9083        | 0.9220        |
| 139 / 2    | 0.8775        | 0.8447        | 0.8607        | 0.9441        | 0.9051        | 0.9242        |
| 128 / 1    | 0.8544        | <b>0.8658</b> | 0.8600        | 0.9220        | 0.9304        | 0.9262        |
| 143 / 1    | 0.8535        | 0.8608        | 0.8571        | 0.9271        | 0.9235        | 0.9253        |
| 128 / 4    | 0.8457        | 0.8617        | 0.8536        | 0.9157        | 0.9294        | 0.9225        |
| 128 / 2    | 0.8643        | 0.8403        | 0.8521        | 0.9258        | 0.8980        | 0.9117        |
| 121 / 2    | 0.8461        | 0.8583        | 0.8521        | 0.9152        | 0.9215        | 0.9183        |
| 121 / 1    | 0.8616        | 0.8415        | 0.8515        | 0.9293        | 0.9028        | 0.9158        |
| 121 / 3    | 0.8580        | 0.8409        | 0.8494        | 0.9257        | 0.9045        | 0.9149        |
| 141 / 1    | 0.8338        | 0.8654        | 0.8493        | 0.8953        | <b>0.9309</b> | 0.9127        |
| 104 / 2    | 0.8687        | 0.8249        | 0.8463        | 0.9273        | 0.8791        | 0.9025        |
| 104 / 3    | 0.8692        | 0.8239        | 0.8459        | 0.9277        | 0.8761        | 0.9011        |
| 148 / 1    | 0.8692        | 0.8239        | 0.8459        | 0.9277        | 0.8761        | 0.9011        |
| 110 / 4    | 0.8394        | 0.8515        | 0.8454        | 0.9040        | 0.9229        | 0.9134        |
| 149 / 1    | 0.8226        | 0.8614        | 0.8416        | 0.8951        | 0.9204        | 0.9076        |
| 146 / 4    | 0.8219        | 0.8622        | 0.8415        | 0.8945        | 0.9235        | 0.9088        |
| 146 / 5    | 0.8222        | 0.8609        | 0.8411        | 0.8951        | 0.9204        | 0.9076        |
| 121 / 5    | 0.8618        | 0.8209        | 0.8409        | 0.9303        | 0.8822        | 0.9056        |
| 110 / 1    | 0.8354        | 0.8429        | 0.8392        | 0.9027        | 0.9186        | 0.9106        |
| 110 / 2    | 0.8421        | 0.8350        | 0.8386        | 0.9066        | 0.9081        | 0.9074        |
| 149 / 3    | 0.8639        | 0.8136        | 0.8380        | 0.9238        | 0.8682        | 0.8951        |
| 139 / 5    | 0.8706        | 0.8068        | 0.8375        | 0.9286        | 0.8566        | 0.8912        |
| 149 / 4    | 0.8644        | 0.8123        | 0.8375        | 0.9242        | 0.8650        | 0.8936        |
| 149 / 5    | 0.8641        | 0.8121        | 0.8373        | 0.9242        | 0.8651        | 0.8937        |
| 148 / 4    | 0.8835        | 0.7893        | 0.8337        | 0.9367        | 0.8341        | 0.8824        |
| 148 / 2    | 0.8824        | 0.7898        | 0.8335        | 0.9363        | 0.8371        | 0.8839        |
| 148 / 3    | 0.8828        | 0.7890        | 0.8333        | 0.9367        | 0.8345        | 0.8826        |
| 146 / 3    | 0.8280        | 0.8382        | 0.8330        | 0.8996        | 0.9031        | 0.9013        |
| 148 / 5    | 0.8270        | 0.8388        | 0.8328        | 0.8993        | 0.9061        | 0.9027        |
| 146 / 1    | 0.8273        | 0.8375        | 0.8324        | 0.8996        | 0.9031        | 0.9013        |
| 157 / 1    | 0.8476        | 0.8101        | 0.8284        | 0.9128        | 0.8670        | 0.8893        |
| 157 / 2    | 0.8476        | 0.8101        | 0.8284        | 0.9128        | 0.8670        | 0.8893        |
| 157 / 3    | 0.8476        | 0.8101        | 0.8284        | 0.9128        | 0.8670        | 0.8893        |
| 157 / 4    | 0.8476        | 0.8101        | 0.8284        | 0.9128        | 0.8670        | 0.8893        |
| 157 / 5    | 0.8476        | 0.8101        | 0.8284        | 0.9128        | 0.8670        | 0.8893        |
| 139 / 4    | 0.8720        | 0.7885        | 0.8282        | 0.9345        | 0.8359        | 0.8825        |
| 146 / 2    | <b>0.9082</b> | 0.7436        | 0.8177        | 0.9561        | 0.7809        | 0.8597        |
| 104 / 1    | 0.9077        | 0.7435        | 0.8174        | <b>0.9562</b> | 0.7812        | 0.8599        |
| 149 / 2    | 0.9069        | 0.7437        | 0.8173        | 0.9559        | 0.7835        | 0.8611        |
| 128 / 3    | 0.8440        | 0.7896        | 0.8159        | 0.9187        | 0.8541        | 0.8852        |
| Benchmark  | 0.8440        | 0.7877        | 0.8149        | 0.9156        | 0.8492        | 0.8811        |
| 155 / 1    | 0.8312        | 0.7967        | 0.8136        | 0.9009        | 0.8596        | 0.8798        |
| 110 / 3    | 0.8505        | 0.7662        | 0.8062        | 0.9231        | 0.8295        | 0.8738        |
| 110 / 5    | 0.8372        | 0.7416        | 0.7865        | 0.9150        | 0.8081        | 0.8583        |
| 121 / 4    | 0.8345        | 0.7374        | 0.7830        | 0.9123        | 0.7993        | 0.8521        |
| 155 / 3*   | 0.7676        | 0.6886        | 0.7259        | 0.8881        | 0.8041        | 0.8440        |
| 155 / 2*   | 0.7541        | 0.6011        | 0.6690        | 0.8682        | 0.6964        | 0.7729        |
| 143 / 2    | 0.7817        | 0.5552        | 0.6493        | 0.8544        | 0.5990        | 0.7043        |
| 114 / 1    | 0.7219        | 0.5897        | 0.6492        | 0.8348        | 0.6919        | 0.7567        |

|          |        |        |        |        |        |        |
|----------|--------|--------|--------|--------|--------|--------|
| 130 / 1* | 0.7208 | 0.5211 | 0.6049 | 0.8933 | 0.6331 | 0.7410 |
| 116 / 3  | 0.8234 | 0.1916 | 0.3109 | 0.9196 | 0.215  | 0.3485 |
| 116 / 1  | 0.8207 | 0.1853 | 0.3023 | 0.9143 | 0.2072 | 0.3378 |
| 116 / 2  | 0.8419 | 0.1734 | 0.2876 | 0.9291 | 0.1925 | 0.3189 |

*Supplemental Table 2.* Official chemical identification results for strict and approximate normalization measures. Runs are ordered by strict F-score, descending. Highest value in each column is marked in bold. Runs marked with an asterisk are unofficial.

| Team / Run | Strict        |               |               | Approximate   |               |               |
|------------|---------------|---------------|---------------|---------------|---------------|---------------|
|            | Precision     | Recall        | F-score       | Precision     | Recall        | F-score       |
| 110 / 4    | <b>0.8621</b> | 0.7702        | <b>0.8136</b> | <b>0.8302</b> | 0.7867        | <b>0.8030</b> |
| 128 / 2    | 0.7792        | 0.8434        | 0.8101        | 0.7258        | 0.8679        | 0.7864        |
| 110 / 1    | 0.8582        | 0.7641        | 0.8084        | 0.8246        | 0.7709        | 0.7910        |
| 128 / 1    | 0.7833        | 0.8339        | 0.8078        | 0.7400        | 0.8595        | 0.7909        |
| 121 / 1    | 0.7874        | 0.8281        | 0.8072        | 0.7530        | 0.8643        | 0.8015        |
| 121 / 3    | 0.7876        | 0.8272        | 0.8069        | 0.7462        | 0.8606        | 0.7959        |
| 110 / 2    | 0.8221        | 0.7898        | 0.8056        | 0.7760        | 0.8040        | 0.7849        |
| 128 / 4    | 0.7755        | 0.8318        | 0.8027        | 0.7250        | 0.8591        | 0.7822        |
| 121 / 2    | 0.7748        | 0.8315        | 0.8021        | 0.7341        | 0.8669        | 0.7914        |
| 121 / 5    | 0.7821        | 0.8226        | 0.8019        | 0.7468        | 0.8569        | 0.7936        |
| 128 / 3    | 0.7780        | 0.8257        | 0.8011        | 0.7316        | 0.8517        | 0.7827        |
| 157 / 3    | 0.7338        | 0.8683        | 0.7954        | 0.6954        | 0.8976        | 0.7760        |
| 110 / 3    | 0.8124        | 0.7760        | 0.7938        | 0.7759        | 0.8017        | 0.7828        |
| 157 / 5    | 0.7306        | 0.8658        | 0.7925        | 0.6782        | 0.8919        | 0.7625        |
| Benchmark  | 0.8151        | 0.7644        | 0.7889        | 0.7917        | 0.7889        | 0.7857        |
| 141 / 1    | 0.7890        | 0.7849        | 0.7870        | 0.7192        | 0.8254        | 0.7628        |
| 110 / 5    | 0.8310        | 0.7411        | 0.7835        | 0.8051        | 0.7648        | 0.7781        |
| 139 / 2    | 0.7256        | 0.8505        | 0.7831        | 0.7113        | 0.8966        | 0.7883        |
| 139 / 4    | 0.7383        | 0.8281        | 0.7806        | 0.7365        | 0.8777        | 0.7957        |
| 157 / 2    | 0.7078        | <b>0.8698</b> | 0.7805        | 0.6612        | <b>0.9018</b> | 0.7554        |
| 139 / 1    | 0.7212        | 0.8471        | 0.7791        | 0.7107        | 0.8916        | 0.7850        |
| 157 / 4    | 0.7038        | 0.8670        | 0.7769        | 0.6424        | 0.8961        | 0.7399        |
| 157 / 1    | 0.7038        | 0.8670        | 0.7769        | 0.6421        | 0.8959        | 0.7395        |
| 155 / 1    | 0.7886        | 0.7644        | 0.7763        | 0.7309        | 0.7917        | 0.7551        |
| 139 / 3    | 0.7120        | 0.8499        | 0.7749        | 0.6924        | 0.8969        | 0.7757        |
| 121 / 4    | 0.7571        | 0.7886        | 0.7725        | 0.7311        | 0.8441        | 0.7774        |
| 139 / 5    | 0.7300        | 0.8159        | 0.7705        | 0.7257        | 0.8676        | 0.7837        |
| 155 / 3*   | 0.7836        | 0.7243        | 0.7527        | 0.7083        | 0.7499        | 0.7227        |
| 155 / 2*   | 0.7634        | 0.7050        | 0.7330        | 0.7012        | 0.7323        | 0.7094        |
| 104 / 1    | 0.6720        | 0.7475        | 0.7078        | 0.6319        | 0.8097        | 0.7039        |
| 149 / 2    | 0.6645        | 0.7451        | 0.7025        | 0.6260        | 0.8174        | 0.7033        |
| 148 / 4    | 0.6481        | 0.7629        | 0.7008        | 0.6043        | 0.8281        | 0.6923        |
| 148 / 3    | 0.6477        | 0.7626        | 0.7004        | 0.6044        | 0.8284        | 0.6925        |
| 148 / 2    | 0.6401        | 0.7607        | 0.6952        | 0.5984        | 0.8348        | 0.6909        |
| 149 / 4    | 0.6306        | 0.7730        | 0.6946        | 0.5825        | 0.8385        | 0.6811        |
| 149 / 5    | 0.6303        | 0.7727        | 0.6943        | 0.5828        | 0.8392        | 0.6815        |
| 104 / 2    | 0.6248        | 0.7699        | 0.6898        | 0.5778        | 0.8466        | 0.6813        |
| 149 / 3    | 0.6225        | 0.7708        | 0.6887        | 0.5765        | 0.8456        | 0.6793        |
| 146 / 1    | 0.5931        | 0.7816        | 0.6744        | 0.5418        | 0.8558        | 0.6581        |
| 148 / 5    | 0.5871        | 0.7806        | 0.6702        | 0.5396        | 0.8616        | 0.6580        |
| 146 / 2    | 0.6298        | 0.7105        | 0.6677        | 0.5816        | 0.7806        | 0.6617        |
| 148 / 1    | 0.5939        | 0.7344        | 0.6567        | 0.5424        | 0.8156        | 0.6473        |
| 104 / 3    | 0.5939        | 0.7344        | 0.6567        | 0.5417        | 0.8153        | 0.6468        |
| 146 / 3    | 0.5587        | 0.7445        | 0.6384        | 0.5081        | 0.8312        | 0.6262        |

|          |        |        |        |        |        |        |
|----------|--------|--------|--------|--------|--------|--------|
| 146 / 5  | 0.5497 | 0.7454 | 0.6328 | 0.5005 | 0.8337 | 0.6206 |
| 149 / 1  | 0.5496 | 0.7457 | 0.6328 | 0.4998 | 0.8334 | 0.6201 |
| 146 / 4  | 0.5467 | 0.7491 | 0.6321 | 0.4992 | 0.8402 | 0.6216 |
| 114 / 1  | 0.8334 | 0.4645 | 0.5965 | 0.8273 | 0.5279 | 0.6368 |
| 143 / 1  | 0.4326 | 0.6541 | 0.5208 | 0.4418 | 0.8108 | 0.5664 |
| 143 / 2  | 0.4393 | 0.5392 | 0.4842 | 0.4843 | 0.7222 | 0.5736 |
| 130 / 1* | 0.4575 | 0.4449 | 0.4511 | 0.5461 | 0.6093 | 0.5662 |

*Supplemental Table 3.* Official chemical indexing results with both strict and approximate measures using the updated indexing. The Increase column shows the increase in F-score for the run compared with the F-score using the original MeSH indexing. Runs are ordered by strict F-score, descending. Highest value in each column is marked in bold. Runs marked with an asterisk are unofficial.

| Team / Run | Strict        |               |               |               | Approximate   |               |               |
|------------|---------------|---------------|---------------|---------------|---------------|---------------|---------------|
|            | Precision     | Recall        | F-score       | Increase      | Precision     | Recall        | F-score       |
| 110 / 1    | 0.7417        | 0.5141        | <b>0.6073</b> | 0.1409        | 0.7526        | 0.6779        | 0.6743        |
| 110 / 8*   | 0.6150        | 0.5808        | 0.5974        | 0.1384        | 0.7248        | 0.7513        | <b>0.6938</b> |
| 110 / 5    | <b>0.7463</b> | 0.4816        | 0.5854        | <b>0.1417</b> | 0.7594        | 0.6587        | 0.6680        |
| 110 / 9*   | 0.7309        | 0.4859        | 0.5837        | 0.1186        | 0.7496        | 0.6532        | 0.6591        |
| 128 / 1*   | 0.5506        | 0.5867        | 0.5681        | 0.0864        | 0.6437        | 0.7545        | 0.6507        |
| 128 / 2*   | 0.5458        | 0.5921        | 0.5680        | 0.0855        | 0.6396        | 0.7591        | 0.6503        |
| 110 / 10*  | 0.4921        | 0.6619        | 0.5645        | 0.1227        | 0.6066        | 0.8171        | 0.6502        |
| 110 / 7*   | 0.6335        | 0.4870        | 0.5507        | 0.1293        | 0.7163        | 0.6419        | 0.6278        |
| 110 / 4    | 0.7343        | 0.4121        | 0.5279        | 0.1298        | <b>0.7782</b> | 0.6036        | 0.6400        |
| 110 / 6*   | 0.5095        | 0.5396        | 0.5241        | 0.1280        | 0.6421        | 0.6915        | 0.6070        |
| Benchmark  | 0.4057        | <b>0.7005</b> | 0.5138        | 0.0997        | 0.5233        | <b>0.8536</b> | 0.6135        |
| 110 / 3    | 0.6812        | 0.4048        | 0.5078        | 0.1177        | 0.7523        | 0.6020        | 0.6303        |
| 110 / 2    | 0.6721        | 0.4062        | 0.5064        | 0.1137        | 0.7372        | 0.5949        | 0.6192        |
| 157 / 1*   | 0.3553        | 0.7137        | 0.4745        | 0.0939        | 0.4614        | 0.8729        | 0.5687        |
| 128 / 4*   | 0.4624        | 0.4105        | 0.4349        | 0.0540        | 0.5257        | 0.5876        | 0.5030        |
| 128 / 3*   | 0.4580        | 0.4060        | 0.4304        | 0.0525        | 0.5212        | 0.5817        | 0.4981        |
| 141 / 1*   | 0.4958        | 0.3061        | 0.3785        | 0.0451        | 0.5459        | 0.4626        | 0.4687        |
| 157 / 2*   | 0.3930        | 0.3527        | 0.3718        | 0.0447        | 0.4599        | 0.5483        | 0.4537        |
| 157 / 3*   | 0.2719        | 0.2752        | 0.2736        | 0.0239        | 0.3812        | 0.4705        | 0.3785        |
